# Supplementary material
Source: HighWire-hosted journal article supplement (https://bmjopen.bmj.com/content/8/12/e025094)
Supplement: inline-supplementary-material-1 [file inline-supplementary-material-1.pdf]

## Supplementary file 1: INTERVIEW TOPIC GUIDE

*So following on from the information sheet, just to reiterate, we're hoping to explore your views and experiences of the HealthPathways initiative in the Southern Region, including what has been challenging or beneficial in relation to their implementation."*

*"CONSENT PROCESS"*

*Before we begin, do you have any further questions?*

The following questions are examples rather than a set of specific questions.

| Question                                                                                                                                                                                                                                                                                                                                                                                                                              |
|---------------------------------------------------------------------------------------------------------------------------------------------------------------------------------------------------------------------------------------------------------------------------------------------------------------------------------------------------------------------------------------------------------------------------------------|
| <b>When did you first hear about HealthPathways in the Southern Region?</b><br>What do you understand them to be?<br>What were your initial thoughts?<br>Did you feel they met a need?                                                                                                                                                                                                                                                |
| <b>What do you know about how HealthPathways in the Southern Region came about and how they created?</b><br>Who was involved?<br>What did you think of the process?                                                                                                                                                                                                                                                                   |
| <b>How useful do you think the HealthPathways initiative in the Southern Region is?</b><br>How were you introduced to them?<br>What were your initial thoughts?<br>Did you feel they met a need? What gap does it fill? What problem does it solve?<br>If not, why not? What is not being addressed? Is this a fix to a problem you don't perceive? Is there a problem about communication/process, etc. rather than concept/content? |
| <b>What has been your experience of using a pathway?</b><br>Did they fit well with normal practice? Have you used a healthpathway; if yes which one? How was that for you? What was better than before/what wasn't so good?                                                                                                                                                                                                           |
| <b>What has worked well in Southern Region initiative to implement HealthPathways in your opinion?</b><br>Why?<br>Communication; resourcing; support; clinical leadership; IT; patient information; effective governance of the work etc.                                                                                                                                                                                             |
| <b>What has not worked so well in Southern Region initiative to implement HealthPathways in your opinion?</b><br>Why?<br>Communication; resourcing; support; clinical leadership; IT; patient information; effective governance of the work etc.                                                                                                                                                                                      |
| <b>If you were asked to make a recommendation about the continuation of HealthPathways, what recommendation would you make?</b><br>Why?                                                                                                                                                                                                                                                                                               |
| <b>If you were asked to suggest further conditions for HealthPathways what would you suggest?</b><br>Why? Are these conditions, particular prevalent or is the care (care coordination) for these conditions particularly fractured/complicated?                                                                                                                                                                                      |
| <b>Is there anything else you would like to make comment on in regard to HealthPathways in general or the HealthPathways initiative in the Southern Region?</b>                                                                                                                                                                                                                                                                       |
