# Supplementary material
Source: HighWire-hosted journal article supplement (https://bmjopen.bmj.com/content/8/12/e025094)
Supplement: inline-supplementary-material-2 [file inline-supplementary-material-2.pdf]

## Supplementary File 2

### COREQ (COnsolidated criteria for REporting Qualitative research) 32 item Checklist

Tong A, Sainsbury P, Craig J. Consolidated criteria for reporting qualitative research (COREQ): a 32-item checklist for interviews and focus groups. International Journal for Quality in Health Care. 2007. Volume 19, Number 6: pp. 349 – 357

| Domain                                         | Item Number | Comment                                                                                                                                                                                                                                                                                                                             | Reported on page number or not applicable (N/A) |
|------------------------------------------------|-------------|-------------------------------------------------------------------------------------------------------------------------------------------------------------------------------------------------------------------------------------------------------------------------------------------------------------------------------------|-------------------------------------------------|
| <b>Domain 1: Research team and reflexivity</b> |             |                                                                                                                                                                                                                                                                                                                                     |                                                 |
| <i>Personal characteristics</i>                |             |                                                                                                                                                                                                                                                                                                                                     |                                                 |
| Interviewer/facilitator                        | 1           | The Assistant Research Fellow (Dr Emma Tumilty) conducted the interviews                                                                                                                                                                                                                                                            | 8                                               |
| Credentials                                    | 2           | All four research team members have extensive experience of conducting qualitative health research                                                                                                                                                                                                                                  | N/A                                             |
| Occupation                                     | 3           | ET was an Assistant Research Fellow at the University of Otago at the time of conducting the research                                                                                                                                                                                                                               | 1                                               |
| Gender                                         | 4           | Two male-identifying and two female identifying researchers (interviewer, female-identifying)                                                                                                                                                                                                                                       |                                                 |
| Experience and training                        | 5           | All four research team members have extensive experience of conducting qualitative health research                                                                                                                                                                                                                                  | N/A                                             |
| <i>Relationship with participants</i>          |             |                                                                                                                                                                                                                                                                                                                                     |                                                 |
| Relationship established                       | 6           | The assistant research fellow had no relationships with participants prior to the study, while the broader research team had varying relationships with the health community at large. It was felt the interviewer should be seen as an unbiased enquirer rather than a person with a particular stance or opinion about the topic. | 8, 24                                           |
| Participant knowledge of the interviewer       | 7           | The interviewer introduced herself to participants stating she was not a medical professional, etc. as well as describing the research team, its funding, the purpose of the project and answering any questions participants may have had about the project and those involved in it.                                              | N/A                                             |

|                                       |    |                                                                                                                                                                                                                                                                       |                   |
|---------------------------------------|----|-----------------------------------------------------------------------------------------------------------------------------------------------------------------------------------------------------------------------------------------------------------------------|-------------------|
| Interviewer characteristics           | 8  | The interviewer was not a medical professional, but aware of the medical system in New Zealand and had read the literature on care pathways prior to beginning the project.                                                                                           | N/A               |
| <b>Domain 2: Study design</b>         |    |                                                                                                                                                                                                                                                                       |                   |
| <i>Theoretical framework</i>          |    |                                                                                                                                                                                                                                                                       |                   |
| Methodological orientation and theory | 9  | Deductive thematic analysis using the Consolidated Framework for Implementation Research                                                                                                                                                                              | 9                 |
| <i>Participant selection</i>          |    |                                                                                                                                                                                                                                                                       |                   |
| Sampling                              | 10 | Purposive sampling was used                                                                                                                                                                                                                                           | 8                 |
| Method of approach                    | 11 | Various methods of approach were used, group emails were sent via a third party, invitations were added to newsletters, emails were sent to practices, and then those taking part or responding were also asked to pass on information to others (snowball sampling). | N/A               |
| Sample size                           | 12 | Ten                                                                                                                                                                                                                                                                   | 10                |
| Non-participation                     | 13 | A number of key informants did not respond to the invitation to participate, however no person responded directly to decline taking part, nor did anybody drop out once agreeing to take part.                                                                        | N/A               |
| <i>Setting</i>                        |    |                                                                                                                                                                                                                                                                       |                   |
| Setting of data collection            | 14 | Participants could determine whether the interview took place in their place of work or in a private meeting room arranged by the interviewer on the university campus.                                                                                               | N/A               |
| Presence of nonparticipants           | 15 | None                                                                                                                                                                                                                                                                  | N/A               |
| Description of sample                 | 16 | Fully presented in results section                                                                                                                                                                                                                                    | 10                |
| <i>Data collection</i>                |    |                                                                                                                                                                                                                                                                       |                   |
| Interview guide                       | 17 | The interview guide was open, but listed a number of key questions and potential prompts. Interviews generally followed a similar approach although questions themselves varied depending on the participant.                                                         | Supplemental file |
| Repeat interviews                     | 18 | No                                                                                                                                                                                                                                                                    | N/A               |
| Audio/visual recording                | 19 | All interviews were audio-recorded and later transcribed.                                                                                                                                                                                                             | 9                 |
| Field notes                           | 20 | Yes, the interviewer wrote brief field notes after each interview regarding the nature of the interview and her perceptions of the participants responses, etc.                                                                                                       | N/A               |

|                                               |    |                                                                                                                                       |       |
|-----------------------------------------------|----|---------------------------------------------------------------------------------------------------------------------------------------|-------|
| Duration                                      | 21 | Interview times varied but were generally around 60mins                                                                               | N/A   |
| Data saturation                               | 22 | Not applicable as a deductive thematic analysis                                                                                       | N/A   |
| Transcripts returned                          | 23 | No                                                                                                                                    | N/A   |
| <b><i>Domain 3: analysis and findings</i></b> |    |                                                                                                                                       |       |
| <i>Data analysis</i>                          |    |                                                                                                                                       |       |
| Number of data coders                         | 24 | The interviewer coded the data and described codes and these were discussed with all members of the interview team on a regular basis | 9     |
| Description of the coding tree                | 25 | Codes had tags and description within the software except for where they were self-explanatory                                        | 9     |
| Derivation of themes                          | 26 | The themes were those used in the Consolidated Framework for Implementation Research                                                  | 9     |
| Software                                      | 27 | nVivo 11 was used                                                                                                                     | 9     |
| Participant checking                          | 28 | No                                                                                                                                    | N/A   |
| <i>Reporting</i>                              |    |                                                                                                                                       |       |
| Quotations presented                          | 29 | Yes quotations are presented and identified in a manner protecting participants confidentiality                                       | 10-18 |
| Data and findings consistent                  | 30 | Consistency between the data and the findings exists                                                                                  | 10-18 |
| Clarity of major themes                       | 31 | Yes, major themes are clearly identified                                                                                              |       |
| Clarity of minor themes                       | 32 | Yes, minor themes (CIFR constructs) are clearly identified and related to major themes.                                               | 10-18 |
